# Supplementary material for: Image Motives Drive Lying Behavior Independent of Financial Incentives: Experimental Evidence from Strength, Preference, and President Rating Tasks
Source: Research Square preprint supplement (doi:10.21203/rs.3.rs-7180420/v1), 2025-08-21
Supplement: Supplementary file 1 [file b88dced5a71bf9a998697db6.docx]

**Supplementary Information**

Image Motives Drive Lying Behavior Independent of Financial Incentives: Experimental Evidence from Strength, Preference, and President Rating Tasks

Kai Barron, Agne Kajackaite, and Silvia Saccardo

July 21, 2025

**Additional Figures**

Experiment 2:

Figure A.1: Distribution of final scores by political affiliation


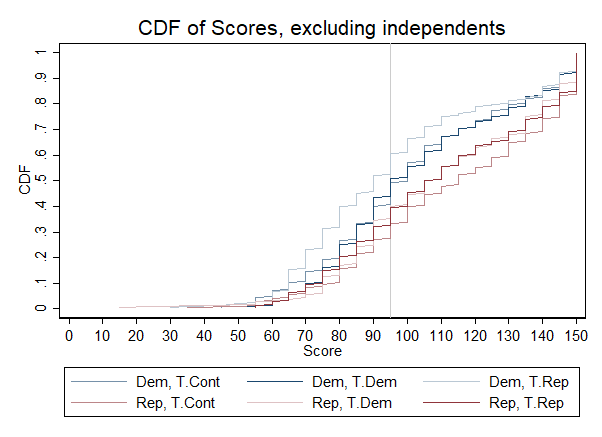


Figure A.1 displays the distributions of the final scores in the *Control*, *Democrat Identity Frame*, and *Republican Identity Frame* conditions, separately for Democrats and Republicans. Democrats react to the *Republican Identity Frame* by decreasing their average final score from 102.13 in *Control* to 96.32 in *Republican Identity Frame,* which isstatistically significant(p=0.041, Fisher-Pitman test). They do not react, however, to the *Democrat Identity Frame*, and the average score of 103.40 points is only slightly higher in this treatment than in *Control* (p=0.638, Fisher-Pitman test). In addition, the fraction of scores that are higher than 95 points decreases from 50.72% in the *Control* to 39.42% in the *Republican Identity Frame* (p=0.021, proportion test), but does not change significantly in the *Democrat Identity Frame* (49.07%; p=0.734, proportion test).

Republicans, on the other hand, do not display a statistically significant change in their behavior between the treatments. Their average final score amounts to 113.94 points in *Control* and decreases slightly but not significantly to 109.86 in the *Democrat Identity Frame* (p=0.158, Fisher-Pitman test) and 109.98 in the *Republican Identity Frame* (p=0.153, Fisher-Pitman test). In addition, the fraction of scores that are higher than 95 points does not change significantly when moving from the *Control* (66.82%) to the *Republican Identity Frame* (59.89%; p=0.152, proportion test) and the *Democrat Identity Frame* (60.45%; p=0.167, proportion test).

*Experiment 3:*

Figure A.2: Fraction of Democrats reporting a preference for "phone calls" or "Trump"


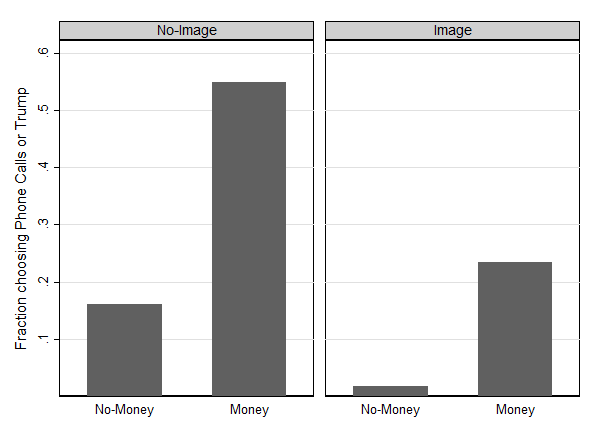


**Additional Tables**

*Experiment 2:*

Table A.1 compliments the results in the main text by presenting the results of an OLS regression analysis, separating the analysis by political party membership. Column (1) focuses on Democrats and shows that individuals in the undesirable-image conditions on average indicate a significantly lower number of points (5.80 fewer points) than those in the control condition (p=0.040). By contrast, participants in the desirable-image condition indicate a 1.28-points-higher score than those in the control condition, but this difference is not statistically significant (p=0.635). The results are robust to controlling for gender and age (column (2)). Columns (3) and (4) focus on Republicans and show that participants in the undesirable-image condition reduce their scores by 4.08 to 4.46 points, though this reduction is not statistically significant (p=0.159 in column (3) and p=0.127 in column (4)). In columns (5) and (6), we focus on the full sample and show the difference between Democrats’ and Republicans’ reduction in scores in the undesirable-image treatment is not statistically significant (p=0.669 in column (5) and p=0.687 in column (6)).

Table A.1: Response to desirable and undesirable political image comparison cues

|  | Democrats | | Republicans | | Both | |
| --- | --- | --- | --- | --- | --- | --- |
| DV: Score in the test | (1) | (2) | (3) | (4) | (5) | (6) |
|  |  |  |  |  |  |  |
| Desirable Image | 1.28 | 1.48 | -3.96 | -4.16 | 1.28 | 1.48 |
|  | (2.69) | (2.70) | (2.75) | (2.75) | (2.69) | (2.69) |
| Undesirable Image | -5.80* | -6.06* | -4.08 | -4.46 | -5.80* | -6.05* |
|  | (2.82) | (2.81) | (2.89) | (2.92) | (2.82) | (2.81) |
| Republican |  |  |  |  | 11.81*** | 11.57*** |
|  |  |  |  |  | (2.77) | (2.78) |
| Republican * Desirable Image |  |  |  |  | -5.24 | -5.57 |
|  |  |  |  |  | (3.85) | (3.84) |
| Republican * Undesirable Image |  |  |  |  | 1.73 | 1.63 |
|  |  |  |  |  | (4.04) | (4.04) |
|  |  |  |  |  |  |  |
| Constant | 102.13*** | 107.71*** | 113.94*** | 115.07*** | 102.13*** | 105.80*** |
|  | (1.96) | (3.90) | (1.96) | (4.45) | (1.96) | (3.22) |
|  |  |  |  |  |  |  |
| Controls | N | Y | N | Y | N | Y |
| Observations | 631 | 631 | 619 | 619 | 1,250 | 1,250 |
| R-squared | 0.01 | 0.02 | 0.00 | 0.01 | 0.04 | 0.05 |
|  |  |  |  |  |  |  |
| *Notes:* This table reports results from an OLS regression with heteroskedasticity-robust standard errors in parentheses. The dependent variable is the score in the test. Desirable Image is a dummy variable coded as 1 when participants were in the desirable-image condition (i.e., Republicans in the Republicans condition and Democrats in the Democrats condition). Undesirable Image is a dummy variable coded as 1 when participants were in the undesirable image condition (i.e., Republicans in the Democrats condition and Democrats in the Republicans condition). Female is a dummy variable coded as 1 for female participants, and 0 otherwise. Age indicates participants’ age. Republican is a dummy variable coded a 1 for participants who self-reported being Republican, and 0 otherwise. *** p<0.001, ** p<0.01, * p<0.05. | | | | | | |

**Instructions (English Version)**

***Experiment 1***

*Translation to English*

*//Image-Observed//*

Welcome to our experiment. Please read the instructions carefully. If you have any questions, please raise your hand.

You will receive 10 Euros in this experiment (5 Euros show-up fee + 5 Euros for participation), which will be paid out at the end of the experiment.

Your task in this experiment is to do as many push-ups as you can without taking breaks. You will have 3 minutes for the task. Once you are done with the task (i.e., once you can no longer do an additional push up without taking a break), you can take some time to recover.

Please let the experimenter know when you are ready to start. The experimenter will start the countdown on the timer clock. When the time is up, the experimenter will let you know. Please tell then the experimenter the number of push-ups you did. The experimenter will write down the number of the push-ups on the bottom of the sheet.

If you have any questions, please let the experimenter know.

The number of the push-ups: _____

Thank you for participating!

*//Image-Unobserved//*

Welcome to our experiment. Please read the instructions carefully. If you have any questions, please raise your hand.

You will receive 10 Euros in this experiment (5 Euros show-up fee + 5 Euros for participation), which will be paid out at the end of the experiment.

Your task in this experiment is to do as many push-ups as you can without taking breaks. You will have 3 minutes for the task. Once you are done with the task (i.e., once you can no longer do an additional push up without taking a break), you can take some time to recover.

Please let the experimenter know when you are ready to start. The experimenter will start the countdown in the timer clock and then wait for you in the other room. When the time is up, the experimenter will knock on the door and then come in. Please tell then the experimenter the number of push-ups you did. The experimenter will write down the number of the push-ups on the bottom of the sheet.

If you have any questions, please let the experimenter know.

The number of the push-ups: _____

Thank you for participating!

*//Image&Money-Observed//*

Welcome to our experiment. Please read the instructions carefully. If you have any questions, please raise your hand.

You will receive 10 Euros in this experiment (5 Euros show-up fee + 5 Euros for participation), which will be paid out at the end of the experiment. You will also be able to earn additional money.

Your task in this experiment is to do as many push-ups as you can without taking breaks. You will have 3 minutes for the task. Once you are done with the task (i.e., once you can no longer do an additional push up without taking a break), you can take some time to recover.

For every push-up you do, you will receive 10 cents. That is, your payoff in this experiment will be:

10 EUR + 10 cents * number of push-ups

Please let the experimenter know when you are ready to start. The experimenter will start the countdown on the timer clock. When the time is up, the experimenter will let you know. Please tell then the experimenter the number of push-ups you did. The experimenter will write down the number of the push-ups on the bottom of the sheet.

If you have any questions, please let the experimenter know.

The number of the push-ups: _____

Thank you for participating!

*//Image&Money-Unobserved//*

Welcome to our experiment. Please read the instructions carefully. If you have any questions, please raise your hand.

You will receive 10 Euros in this experiment (5 Euros show-up fee + 5 Euros for participation), which will be paid out at the end of the experiment. You will also be able to earn additional money.

Your task in this experiment is to do as many push-ups as you can without taking breaks. You will have 3 minutes for the task. Once you are done with the task (i.e., once you can no longer do an additional push up without taking a break), you can take some time to recover.

For every push-up you do, you will receive 10 cents. That is, your payoff in this experiment will be:

10 EUR + 10 cents * number of push-ups

Please let the experimenter know when you are ready to start. The experimenter will start the countdown in the timer clock and then wait for you in the other room. When the time is up, the experimenter will knock on the door and then come in. Please tell then the experimenter the number of push-ups you did. The experimenter will write down the number of the push-ups on the bottom of the sheet.

If you have any questions, please let the experimenter know.

The number of the push-ups: _____

Thank you for participating!

***Experiment 2***

CAPTCHA QUESTION

//Screen 1//

A survey about your preferences

Thank you for participating in our survey. This survey is about the things that you like in your everyday life! We will pay you $0.50 for participating at the end of the survey. The survey will take around 5 minutes.

//Screen 1b//

Attention check:

"Please type the first and last letter from the following string of letters "AQPWPQL".

First letter: ___

Last letter: ___

//Screen 2//

//Control//

During this session, you will complete a survey.

//Republican Identity Frame//

During this session, you will complete a survey. We have already conducted the same survey with 100 Americans. Of those surveyed, Republicans typically scored high – on average, Republicans collected more than 95 points out of 150 in the survey. Fill out the survey to find out how well your preferences match those of the average Republican!

//Democrat Identity Frame//

During this session, you will complete a survey. We have already conducted the same survey with 100 Americans. Of those surveyed, Democrats typically scored high – on average, Democrats collected more than 95 points out of 150 in the survey. Fill out the survey to find out how well your preferences match those of the average Democrat!

//Screen 3//

Please answer the following 30 questions. For each question, there are two options. Pick the option that best represents you, your preferences and tastes. Each option comes with either 0 or 5 points that will be added up to determine your final score. That is, each question will give you either 0 or 5 points. Since there are altogether 30 questions, you can earn between 0 and 150 points in this survey. At the end of the survey, the final score will be shown on the screen.

//Screen 4, …//

For each of the questions below, pick the option that best represents you, your preferences and tastes.

Which type of food do you prefer?

1. Ice-cream (5 points)
2. Cake (0 points)

Which holiday do you like more?

1. Christmas (5 points)
2. Thanksgiving (0 points)

Which of the following colors do you prefer?

1. Green (5 points)
2. Yellow (0 points)

Out of the following two sports, which do you prefer?

1. Basketball (0 points)
2. Football (5 points)

Which foreign city would you be more likely to visit?

1. Paris (0 points)
2. London (5 points)

If you could visit one of the following two continents, which would you visit?

1. Australasia (0 points)
2. Africa (5 points)

When showering, are you someone who sets the temperature “hot” or “warm”?

1. Hot (5 points)
2. Warm (0 points)

Which season do you enjoy more?

1. Fall (0 points)
2. Spring (5 points)

Which form of communication do you prefer?

1. Phone call (5 points)
2. Text (0 points)

Which personality type better reflects you?

1. Extrovert (5 points)
2. Introvert (0 points)

Are you more of a morning person or an evening person?

1. Morning (5 points)
2. Evening (0 points)

Which of the following beverages do you prefer?

1. Water (0 points)
2. Juice (5 points)

Which TV show do you like more?

1. Friends (5 points)
2. The Office (0 points)

Which actress do you like more?

1. Nicole Kidman (0 points)
2. Scarlett Johansson (5 points)

Which kind of a trip would you prefer?

1. An adventure in nature (0 points)
2. Relaxing at a beachside resort (5 points)

Which of the following do you spend more time on?

1. Instagram (5 points)
2. Facebook (0 points)

Which type of music would you prefer to listen to?

1. Rap (0 points)
2. Pop (5 points)

If you were an animal, which would better reflect you?

1. Lion (0 points)
2. Dolphin (5 points)

Would you consider yourself more of a “car” person or a “bicycle” person?

1. Car (0 points)
2. Bicycle (5 points)

Which of the following artists do you prefer?

1. Klimt (0 points)
2. Kandinsky (5 points)

Do you believe that going above the speed limit is:

1. Always completely wrong (0 points)
2. Sometimes permissible (5 points)

Which feature about yourself do you like more?

1. Intelligence (5 points)
2. Honesty (0 points)

Pick a place to go on a date:

1. Cinema (0 points)
2. Restaurant (5 points)

Which dish would you prefer for a dinner?

1. Steak (5 points)
2. Salad (0 points)

Pick a movie genre you would most like to watch right now:

1. Drama (0 points)
2. Comedy (5 points)

If you had a choice, where would you like to live?

1. In a city (5 points)
2. In a village (0 points)

If you were a flower, which one would you be?

1. Rose (5 points)
2. Poppy (0 points)

Which state would you prefer to travel to?

1. Pennsylvania (0 points)
2. Nevada (5 points)

Which month do you like more?

1. July (5 points)
2. September (0 points)

Which alcoholic beverage do you prefer?

1. Wine (0 points)
2. Beer (5 points)

//Screen N-2//

Thanks for sharing your tastes and preferences. Your scored ___ points.

//Screen N-1//

Just a few more questions!

Your gender:

Male

Female

Other

Which political party to associate more closely with?

Republican

Democrat

Independent

🡪 If Independent: Do you identify more with Republicans or Democrats?

Republicans

Democrats

Your age: ___

//Screen N//

Thank you for participating in our study!

***Experiment 3***

//Consent//

This study is part of a research study conducted by Agne Kajakaite (WZB Berlin Social Science Center), Kai Barron (WZB Berlin Social Science Center) and Silvia Saccardo (Carnegie Mellon University).

The purpose of the research is to understand human judgment and decision making.

Procedures

In this study, you will be asked to answer a series of questions and we will record your responses. We will ask you to make judgments and report your opinion. None of these questions will be invasive or emotionally evocative.

Participant Requirements

Participation in this study is limited to individuals age 18 and older.

Risks

The risks and discomfort associated with participation in this study are no greater than those ordinarily encountered in daily life or during mild physical activity, such as when surfing the Internet or composing an email.

Benefits

There may be no personal benefit from your participation in the study but the knowledge received may be of value to humanity.

Compensation & Costs

You will receive 0.50 GBP (approximately $0.65) in exchange for your participation in this study with the opportunity to earn a bonus payment.

There will be no cost to you if you participate in this study.

Confidentiality

By participating in this research, you understand and agree that WZB Berlin and Carnegie Mellon may be required to disclose your consent form, data and other personally identifiable information as required by law, regulation, subpoena or court order. Otherwise, your confidentiality will be maintained in the following manner:

The researchers will take the following steps to protect participants’ identities during this study: (1) Each participant will be assigned a number; (2) The researchers will record any data collected during the study by number, not by name; (3) Any original recordings or data files will be stored in a secured location accessed only by authorized researchers; (4) IP addresses will be deleted before any data is analyzed.

Right to Ask Questions & Contact Information

If you have any questions about this study, you should feel free to ask them by contacting Dr. Agne Kajakaite, WZB Berlin Social Science Center, agne.kajackaite@wzb.eu. If you have questions later, desire additional information, or wish to withdraw your participation please contact the Principal Investigator by mail, phone or e-mail in accordance with the contact information listed above.

The WZB Berlin Ethics Committe has approved the use of human participants for this study.

Voluntary Participation

Your participation in this research is voluntary. You may discontinue participation at any time during the research activity.

//Screen 1//

Welcome to the study!

In this study, you will receive 0.50 GBP (approximately $0.65) for participating.

The study will take up to 5 minutes.

Please think about your answers carefully and report them truthfully.

//Screen 2//

//TR//

//No-Image//

Which of the following forms of communication do you prefer?

Phone calls or texting?

Please make up your mind.

Please keep the answer to this question in your head. In addition, write it down on a piece of paper for yourself.

//Image//

Which US President do you prefer?

Donald Trump or Barack Obama?

Please make up your mind.

Please keep the answer to this question in your head. In addition, write it down on a piece of paper for yourself.

//Screen 3//

// No-Money//

We will now ask you to state which of the two options you prefer.

// Money//

We will now ask you to state which of the two options you prefer. Depending on your preference, you may win 1.50 GBP (approximately $2), which will be paid on top of the 0.50 GBP (approximately $0.65) you receive for the survey.

One of the possible answers will pay you 0 GBP ($0) and the other 1.50 GBP (approx $2).

//Screen 4//

//No-Image-No-Money//

Which form of communication do you prefer?

- I prefer phone calls
- I prefer texting

//No-Image-Money//

If you prefer phone calls, you will receive 1.50 GBP (approximately $2); if you prefer texting, you will receive 0 GBP ($0).

Which form of communication do you prefer?

- I prefer phone calls
- I prefer texting

//Image-No-Money//

Which US president do you prefer?

- I prefer Donald Trump
- I prefer Barack Obama

//Image-Money//

If you prefer Donald Trump, you will receive 1.50 GBP (approximately $2); if you prefer Barack Obama, you will receive 0 GBP ($0).

Which US president do you prefer?

- I prefer Donald Trump
- I prefer Barack Obama

//Screen 4//

// Money//

Based on your preferences, you will be paid a bonus of __ GBP.

//Screen 5//

Please answer the following questions.

What is your gender?

- Male
- Female

What is your age? ____

Is English your first language?

- Yes
- No

If not, how fluent are you in English?

1 2 3 4 5 6 7

Not at all Very much

Generally speaking, do you see yourself as a Democrat, Republican or Independent?

- Democrat
- Republican
- Independent

🡪 If Independent: Do you see yourself as more similar to Republicans or Democrats?

- Republicans
- Democrats

Please leave here any comment/suggestion about the study: _______
